# Supplementary material for: Impaired Vitamin A Absorption and Reduced Enterochromaffin Cell Density in Children with Autism Spectrum Disorder: Evidence from Duodenal Biopsies
Source: Research Square preprint supplement (doi:10.21203/rs.3.rs-6941429/v1), 2025-08-18
Supplement: Supplementary file 1 [file 6dd308e919784c1a1e661b15.docx]

# Supplementary Information: Code and Data Summary

## Python Code Used for Statistical Analysis

### Spearman Correlation

from scipy.stats import spearmanr

subset = plot_data[['RBP2', 'Enterochromaffin_Cells_Mean']].dropna()
spearman_corr, spearman_p = spearmanr(subset['RBP2'], subset['Enterochromaffin_Cells_Mean'])

print(f"Spearman correlation coefficient (ρ): {spearman_corr:.2f}")
print(f"p-value: {spearman_p:.4f}")

### Mann–Whitney U Test

from scipy.stats import mannwhitneyu

control = plot_data[plot_data['Group'] == 'Control']
asd = plot_data[plot_data['Group'] == 'ASD']

u_rbp2, p_rbp2 = mannwhitneyu(control['RBP2'], asd['RBP2'])
u_ec, p_ec = mannwhitneyu(control['Enterochromaffin_Cells_Mean'], asd['Enterochromaffin_Cells_Mean'])

print(f"U statistic (RBP2): {u_rbp2}, p-value: {p_rbp2:.4f}")
print(f"U statistic (EC Cells): {u_ec}, p-value: {p_ec:.4f}")

### Age Calculation

from datetime import datetime
import pandas as pd

birthdates = pd.to_datetime(df['Unnamed: 4'], errors='coerce')
reference_date = pd.to_datetime("2025-01-01")
ages = (reference_date - birthdates).dt.days / 365.25
plot_data['Age'] = ages

### Gender Mapping

gender_map = {1: 'Female', 2: 'Male'}
plot_data['Gender'] = df['Unnamed: 5']
plot_data['Gender_Label'] = plot_data['Gender'].map(gender_map)

## Full Dataset Used in Analysis

| Group | Age (Years) | Gender | RBP2 Score | Enterochromaffin Cell Density (Mean) |
| --- | --- | --- | --- | --- |
| Control | 7.09 | Male | 3.0 | 0.78 |
| Control | 6.57 | Male | 2.0 | 0.73 |
| Control | 5.48 | Male | 3.0 | 0.57 |
| Control | 10.41 | Female | 2.0 | 0.75 |
| Control | 6.73 | Male | 3.0 | 0.83 |
| Control | 10.88 | Female | 2.0 | 0.7 |
| Control | 9.05 | Female | 2.0 | 0.63 |
| Control | 6.85 | Female | 2.0 | 0.54 |
| Control | 7.16 | Female | 3.0 | 0.74 |
| Control | 9.41 | Male | 3.0 | 0.63 |
| Control | 9.22 | Male | 3.0 | 0.56 |
| Control | 6.61 | Male | 3.0 | 0.73 |
| Control | 10.88 | Male | 2.0 | 0.71 |
| Control | 9.58 | Male | 3.0 | 0.76 |
| Control | 5.9 | Female | 2.0 | 0.64 |
| Control | 8.82 | Male | 2.0 | 0.61 |
| Control | 8.65 | Male | 2.0 | 0.31 |
| Control | 6.91 | Male | 1.0 | 0.74 |
| Control | 4.31 | Male | 2.0 | 0.41 |
| Control | 6.97 | Male | 3.0 | 0.71 |
| ASD | 7.38 | Male | 2.0 | 0.44 |
| ASD | 10.33 | Male | 3.0 | 0.48 |
| ASD | 13.51 | Female | 1.0 | 0.46 |
| ASD | 11.83 | Male | 1.0 | 0.43 |
| ASD | 14.03 | Male | 1.0 | 0.39 |
| ASD | 6.08 | Male | 2.0 | 0.68 |
| ASD | 8.69 | Male | 1.0 | 0.43 |
| ASD | 11.78 | Male | 2.0 (10% neg) | 0.44 |
| ASD | 2.23 | Male | 2.0 (5% neg) | 0.51 |
| ASD | 7.43 | Male | 2.0 | 0.5 |
| ASD | 9.89 | Male | 2.0 | 0.51 |
| ASD | 11.27 | Male | 1.0 ( 2% neg) | 0.44 |
| ASD | 5.92 | Male | 2.0 | 0.51 |
| ASD | 9.72 | Male | 2.0 | 0.52 |
| ASD | 7.18 | Male | 3.0 | 0.5 |
| ASD | 5.92 | Male | 2 | 0.511 |
| ASD | 7.57 | Male | 2(5%neg) | 0.5 |
| ASD | 6.99 | Female | 2 ( 3%neg) | 0.426 |
| ASD | 9.72 | Male | 2 | 0.517 |
| ASD | 7.18 | Male | 3 | 0.5 |
